# Supplementary material for: Copper halide anion engineering for p-channel electrolyte-gated transistors with superior operational reliability
Source: Royal Society of Chemistry journal article supplement (doi:10.1039/d2tc02062a), 2022-01-01
Supplement: d2tc02062a1.pdf [file d2tc02062a1.pdf]

## Supplementary Materials for

### **Copper Halide Anion Engineering for p-channel Electrolyte-Gated Transistors with Superior Operational Reliability**

Da In Lee<sup>a</sup>, Min Su Kim<sup>a</sup>, Kyung Gook Cho<sup>a</sup>, Kihyon Hong<sup>\*b</sup>, and Keun Hyung  
Lee<sup>\*a,c</sup>

<sup>a</sup>Department of Chemistry and Chemical Engineering, Inha University, Incheon  
22212, Republic of Korea

<sup>b</sup>Department of Materials Science and Engineering, Chungnam National University  
(CNU), Daejeon 34134, Republic of Korea

<sup>c</sup>Education and Research Center for Smart Energy and Materials, Inha University,  
Incheon, 22212, Republic of Korea

Email: khong@cnu.ac.kr (K. Hong), kh.lee@inha.ac.kr (K. H. Lee)

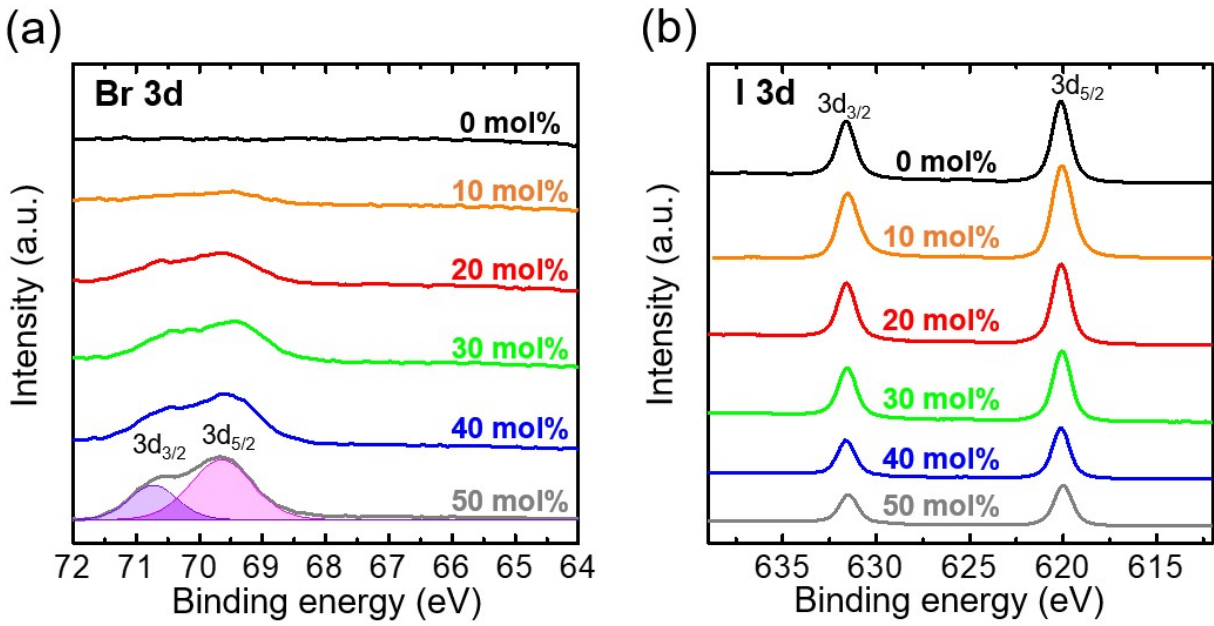

**Figure S1.** (a) Br 3d and (b) I 3d XPS spectra of CuI:Br composite semiconductors with Br concentrations ranging from 0 to 50 mol%.

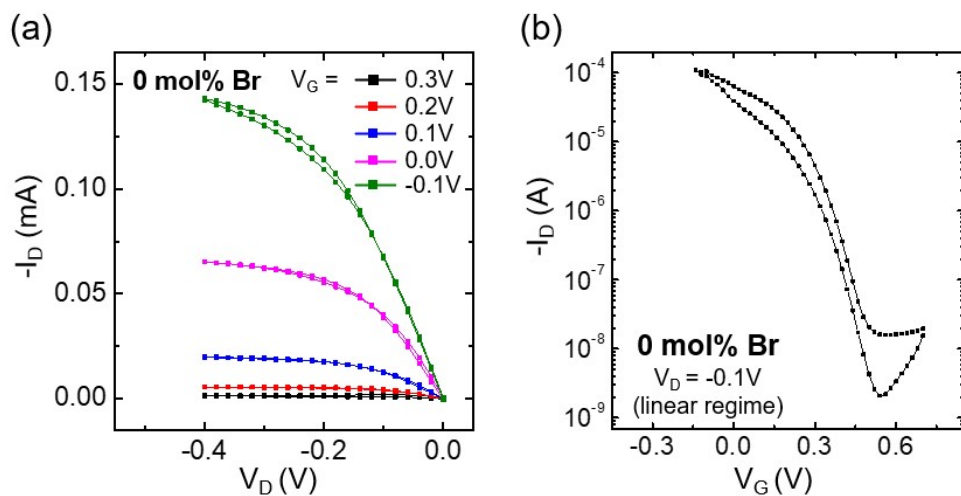

**Figure S2.** Representative (a)  $I_D$ - $V_D$  output and (b)  $I_D$ - $V_G$  transfer curves collected from the EGT using the undoped pristine CuI semiconductor.

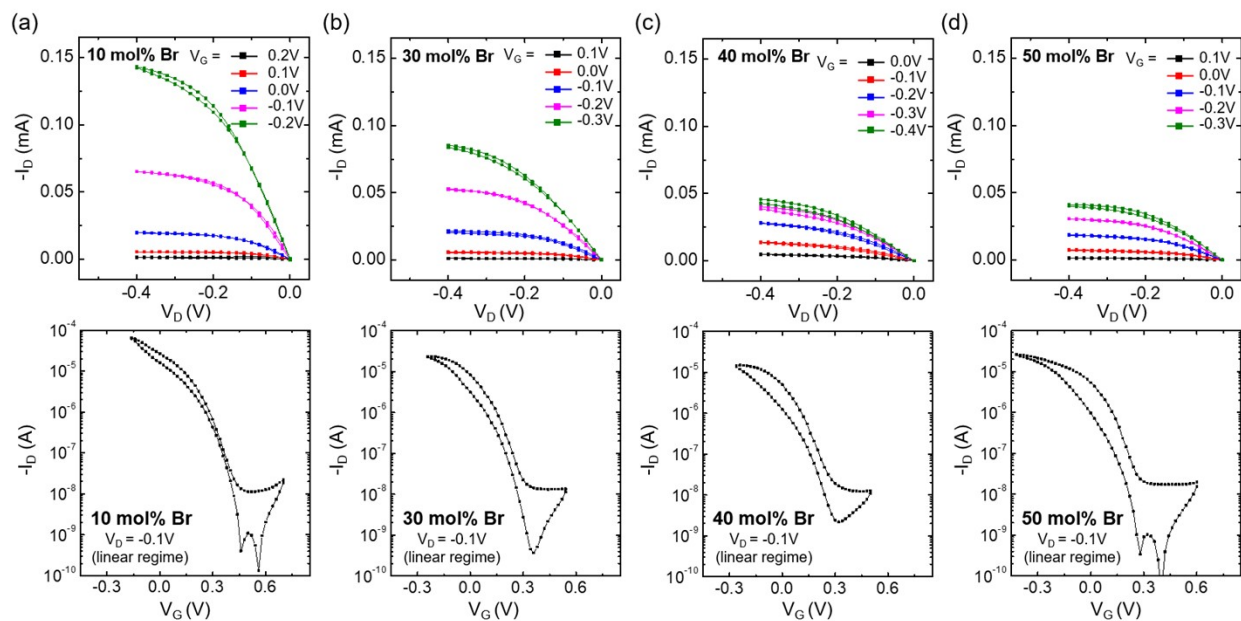

**Figure S3.** Representative  $I_D$ - $V_D$  output and  $I_D$ - $V_G$  transfer curves collected from the CuI:Br EGTs with Br doping concentrations of (a) 10 mol%, (b) 30 mol%, (c) 40 mol%, and (d) 50 mol%.

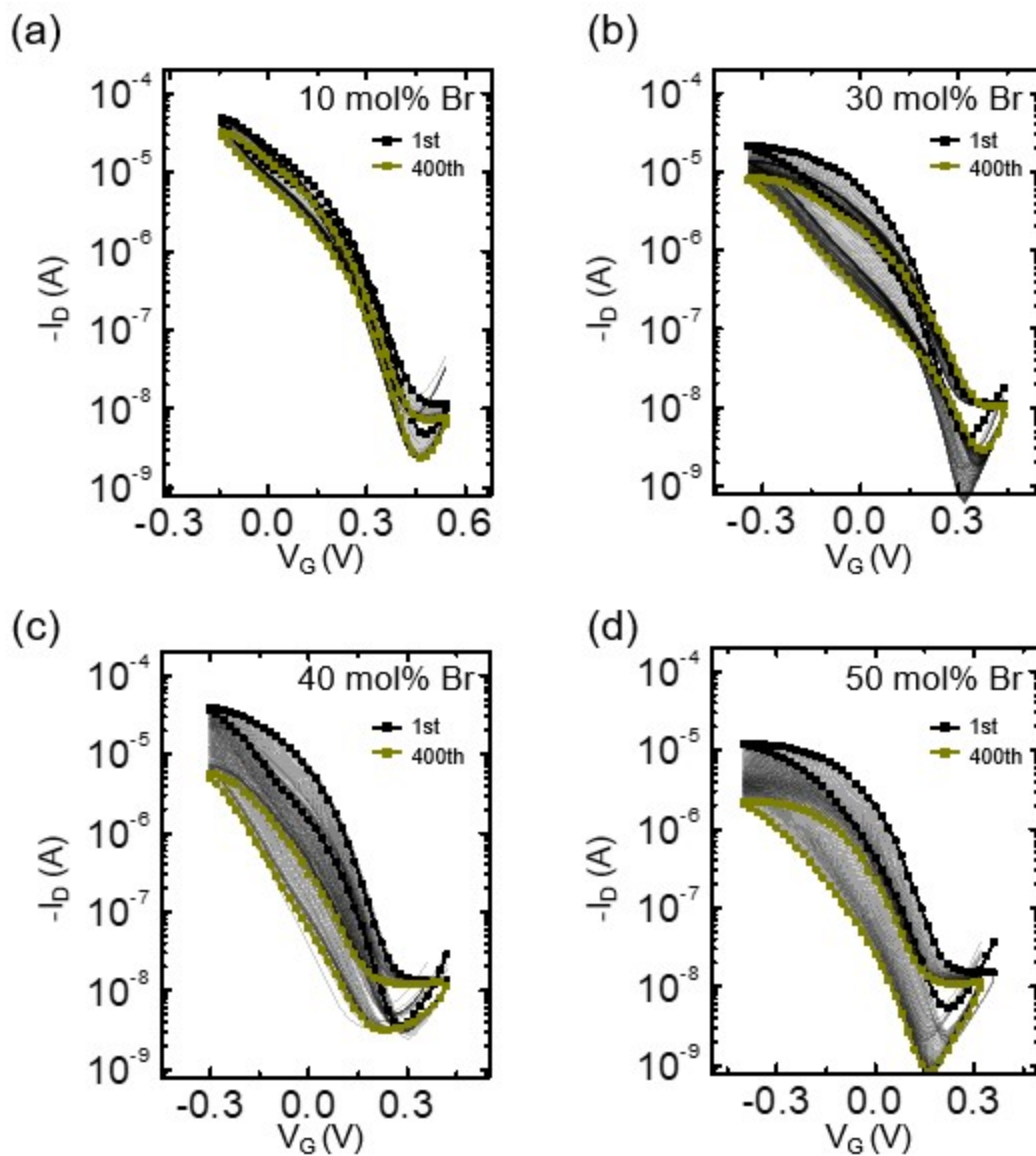

**Figure S4.**  $I_D$ - $V_G$  transfer curves collected in 400 successive operation cycles at  $V_D = -0.1$  V from the EGTs with Br doping concentrations of (a) 10 mol%, (b) 30 mol%, (c) 40 mol%, and (d) 50 mol%.

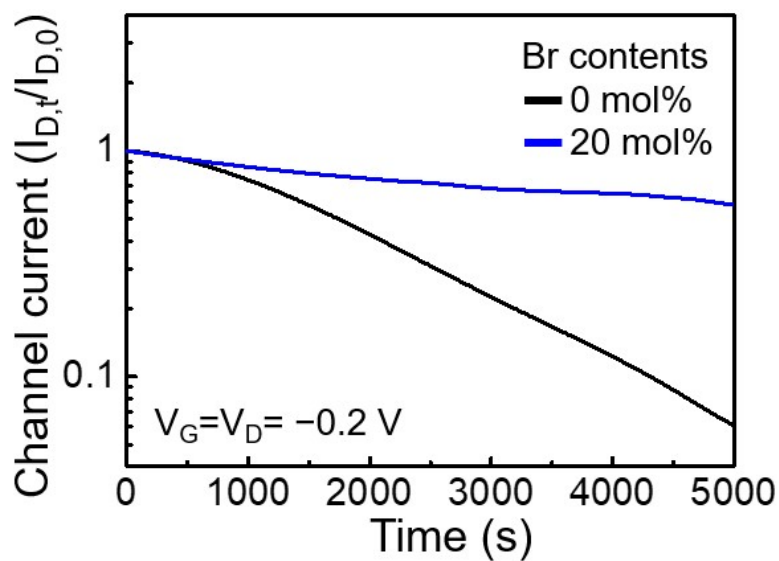

**Figure S5.** Normalized channel current ( $I_{D,t}/I_{D,0}$ ) obtained from the EGTs with pristine CuI (0 mol%) and 20 mol% Br-doped CuI semiconductors over a period of 5000 s at constant  $V_G = V_D = -0.2$  V in ambient air atmosphere.
